# Supplementary material for: Process Evaluation of a Treatment Program for Mood and Anxiety Disorders Among Emerging Adults: Preentry Factors, Engagement, and Outcomes
Source: Atypon-hosted journal article supplement (doi:10.1176/appi.ps.201800219), 2019-01-03
Supplement: appi.ps.201800219.ds001.pdf [file appi.ps.201800219.ds001.pdf]

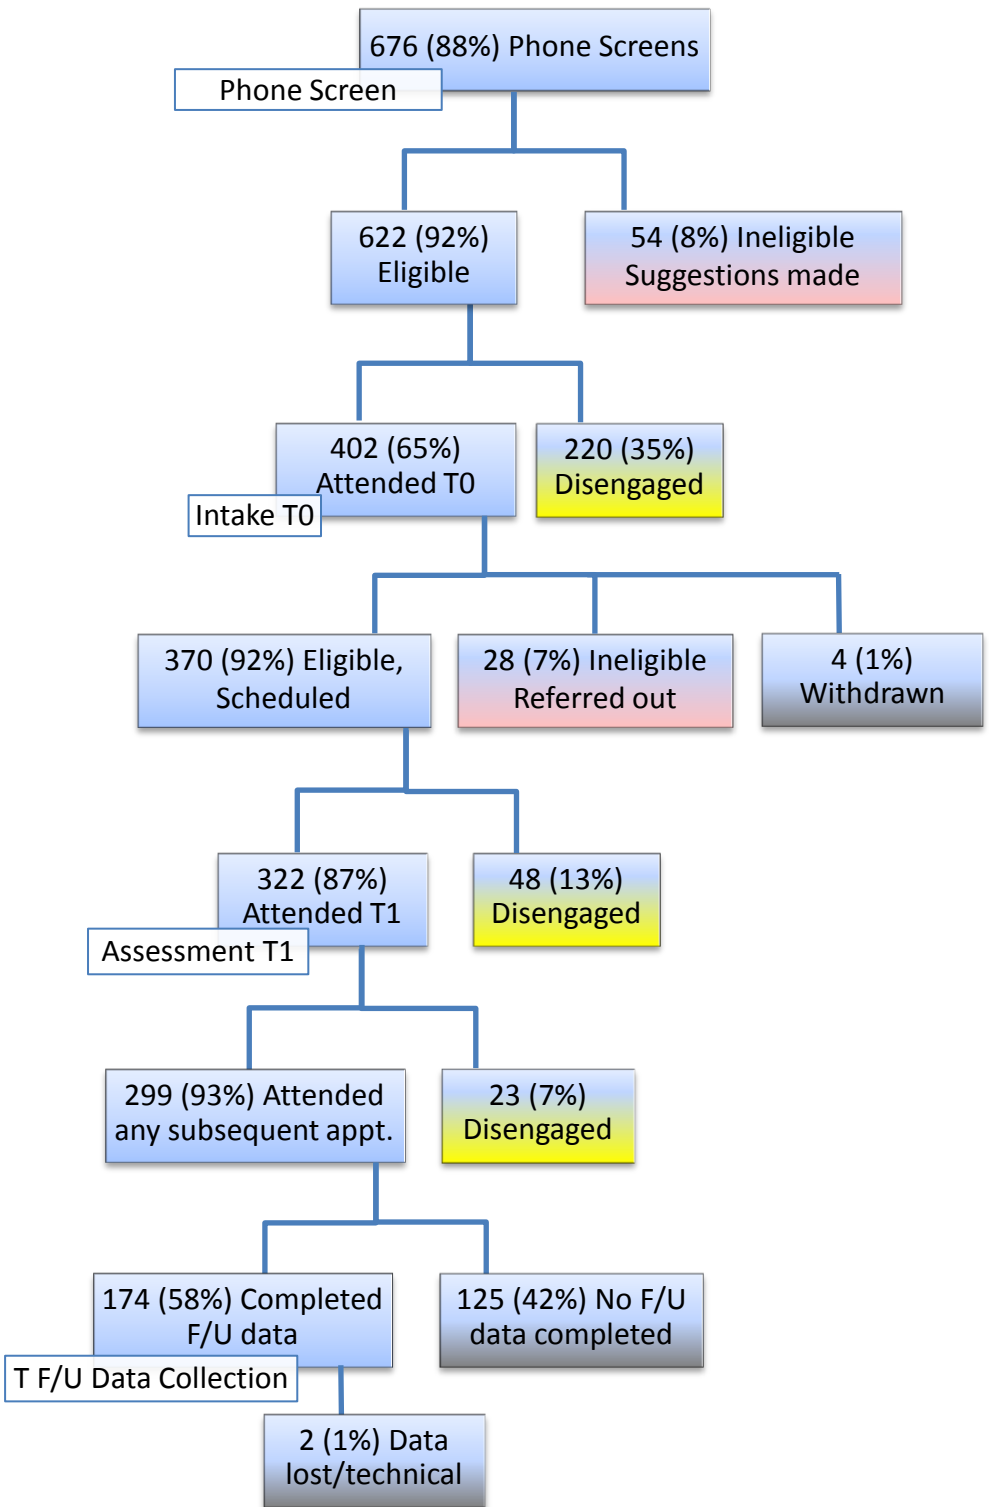

|                                                          | <b>Number</b> | <b>Percent</b> |
|----------------------------------------------------------|---------------|----------------|
| White Canadian/American                                  | 292           | 80             |
| White European                                           | 85            | 23             |
| East Asian                                               | 19            | 5              |
| Aboriginal                                               | 16            | 4              |
| Middle Eastern (e.g., Egypt, Iran, Israel, Saudi Arabia) | 14            | 4              |
| Black Canadian/American                                  | 12            | 3              |
| Latin American                                           | 11            | 3              |
| South Asian (e.g., India, Sri Lanka, Pakistan)           | 8             | 2              |
| Black African                                            | 5             | 1              |
| Indo-Caribbean                                           | 5             | 1              |
| South East Asian (e.g., Vietnam, Malaysia, Philippines)  | 5             | 1              |
| Missing data                                             | 3             | 1              |

Note: N=367, but participants were instructed to endorse all that apply, leading to total endorsement over 100%.

## Prior Service Utilization

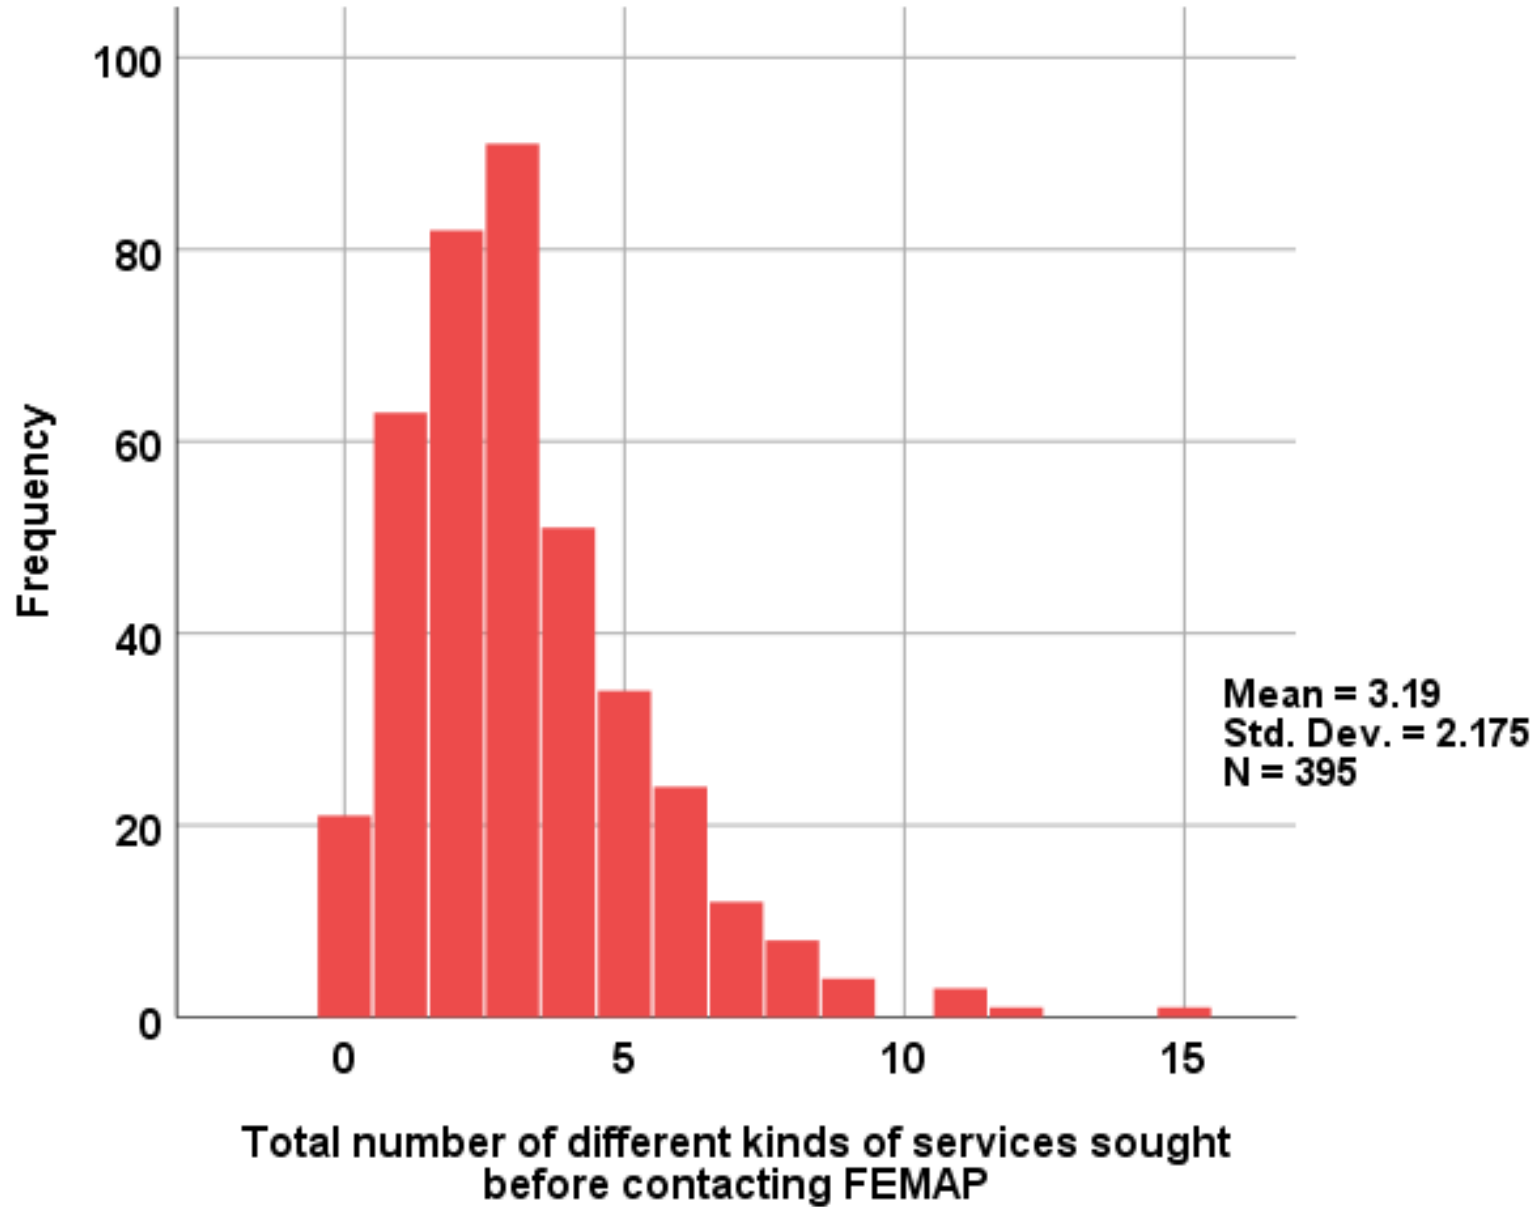

|                           | <b>Mean</b> | <b>Range</b> |
|---------------------------|-------------|--------------|
| <b>MADRS total score</b>  |             |              |
| <b>T0 (n = 219)</b>       | 12.1 ±4.3   | 1.5-24       |
| <b>T1 (n = 214)</b>       | 12.0 ±4.5   | 1.0-23       |
| <b>ASI-3* total score</b> |             |              |
| <b>T0 (n = 218)</b>       | 30.4 ±15.8  | 0-70         |
| <b>T1 (n = 211)</b>       | 31.9 ±15.9  | 0-70         |
| <b>SDS total score</b>    |             |              |
| <b>T0 (n = 218)</b>       | 17.2 ±6.4   | 0-30         |
| <b>T1 (n = 212)</b>       | 16.1 ±7.1   | 0-30         |

T0 = time of entry into FEMAP for Control Group

T1 = time of assessment by treating clinician at FEMAP for Control Group

\*ASI-3 = Anxiety Sensitivity Index, v3, which was used for the control group; 18-item which were identical to those used in the ASI-R, but eliminating the additional 18 items from the ASI-R; 5-point scale from 0-72, with 72 the highest anxiety sensitivity
